# Supplementary material for: Resveratrol Contrasts IL-6 Pro-Growth Effects and Promotes Autophagy-Mediated Cancer Cell Dormancy in 3D Ovarian Cancer: Role of miR-1305 and of Its Target ARH-I
Source: MDPI journal article supplement (doi:10.3390/cancers14092142), 2022-04-25

Figure 2 OVCAR3

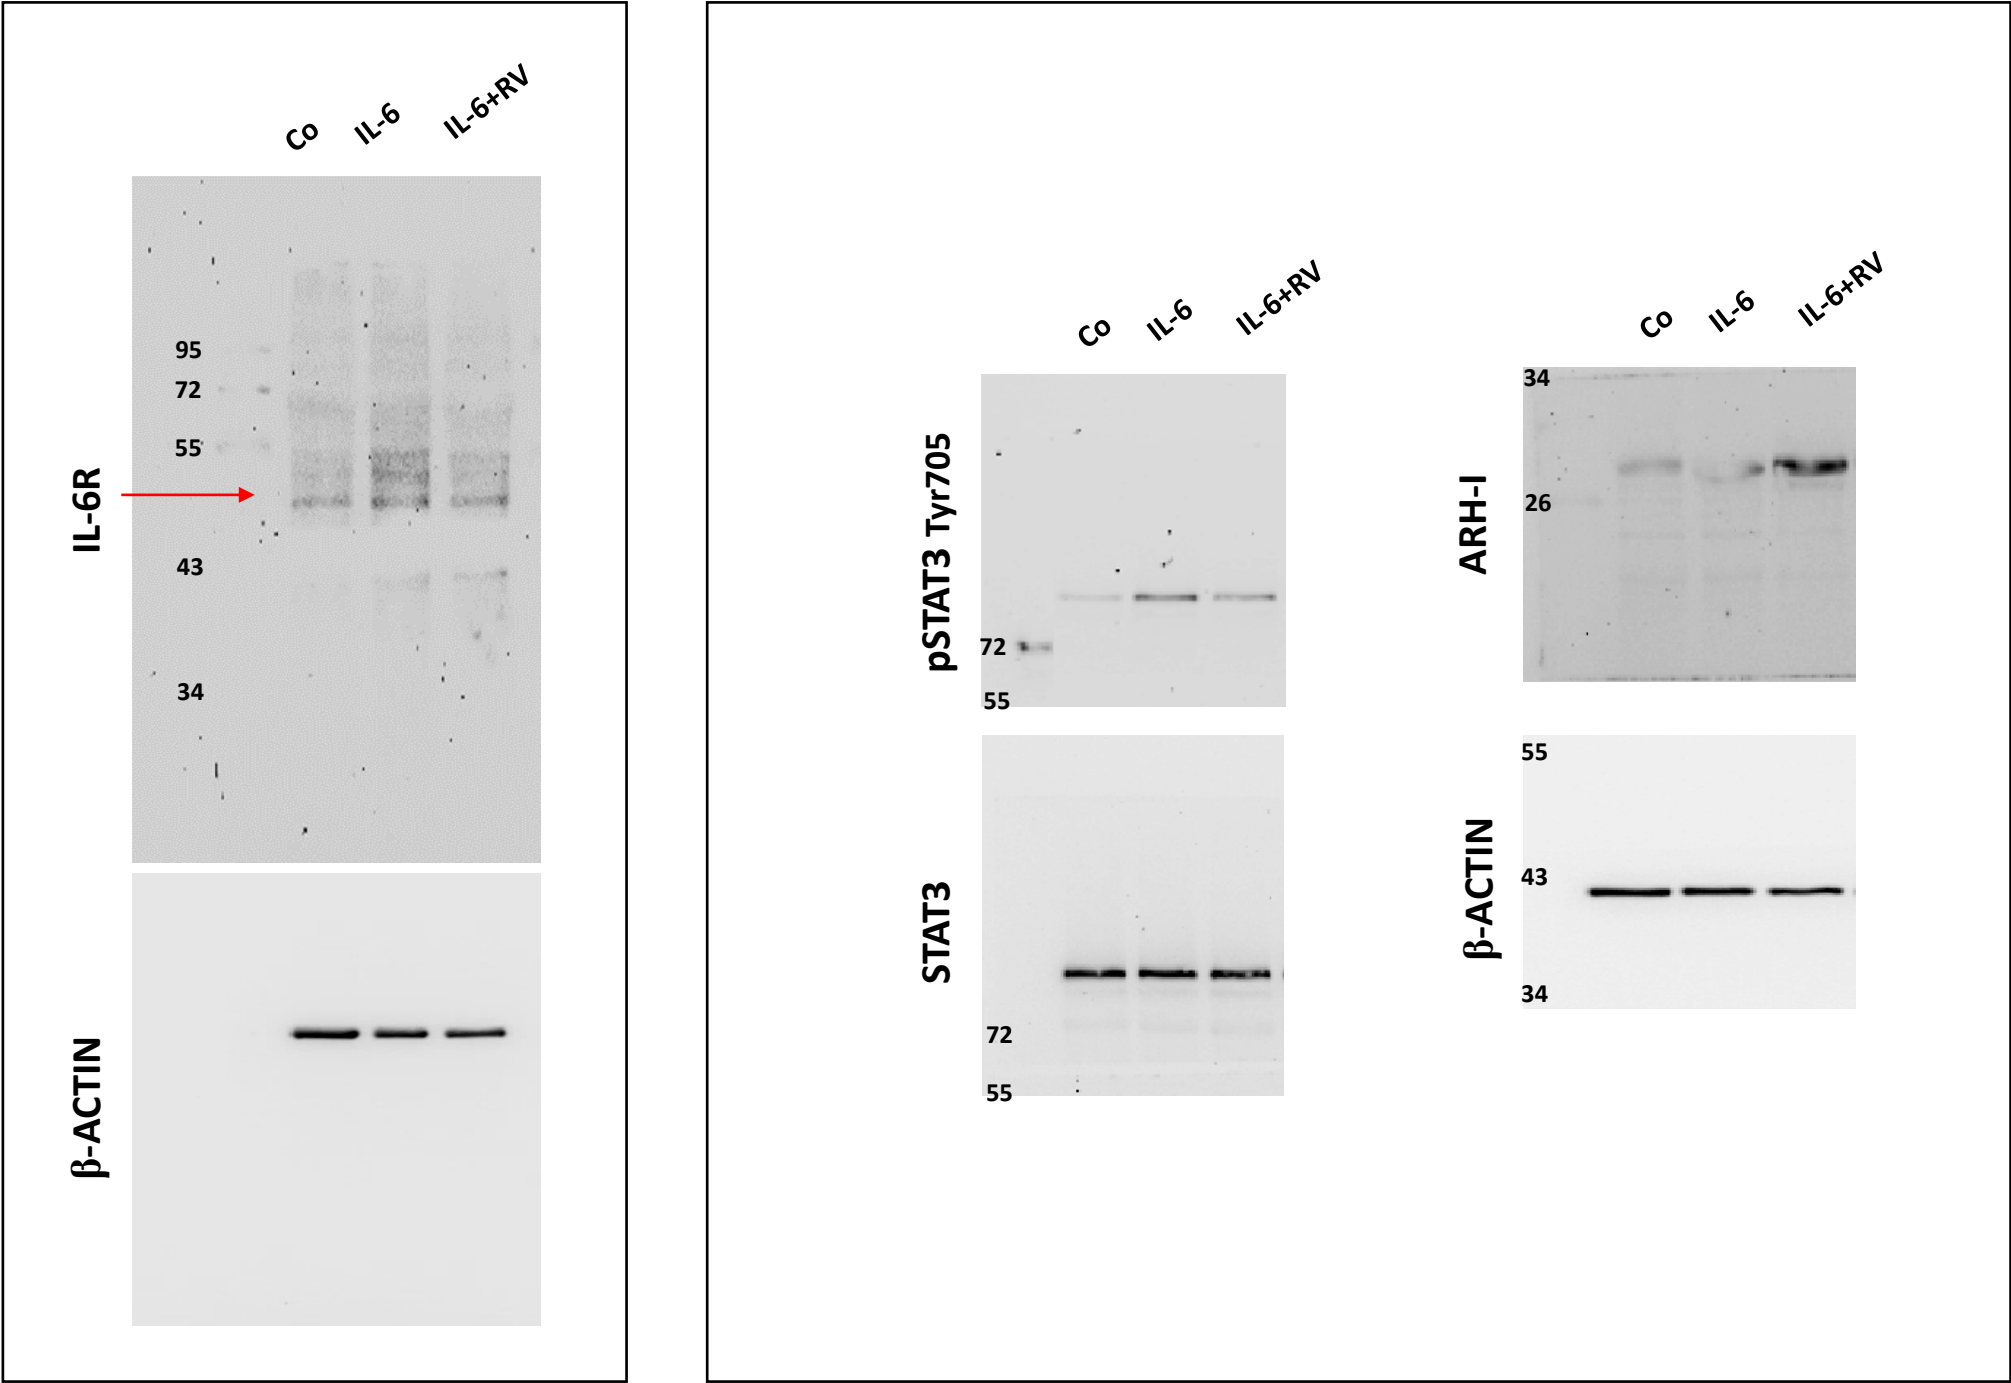

Figure 2 OAW42

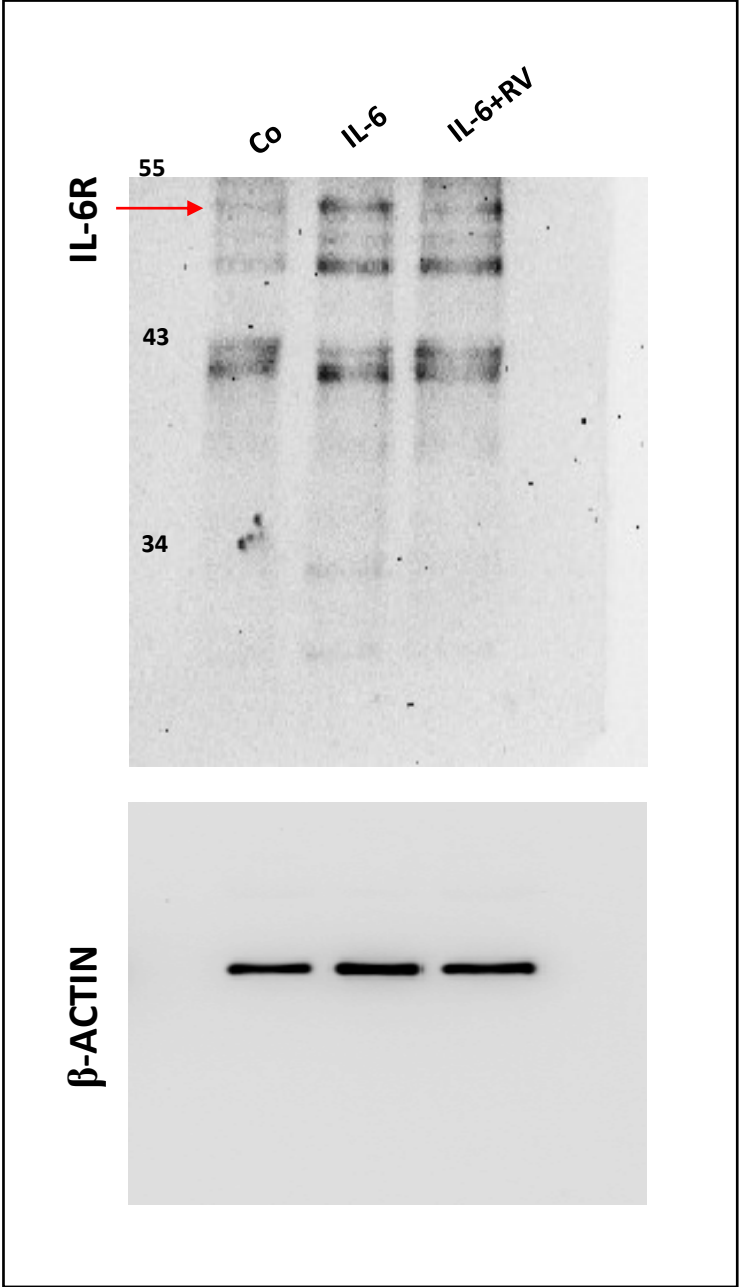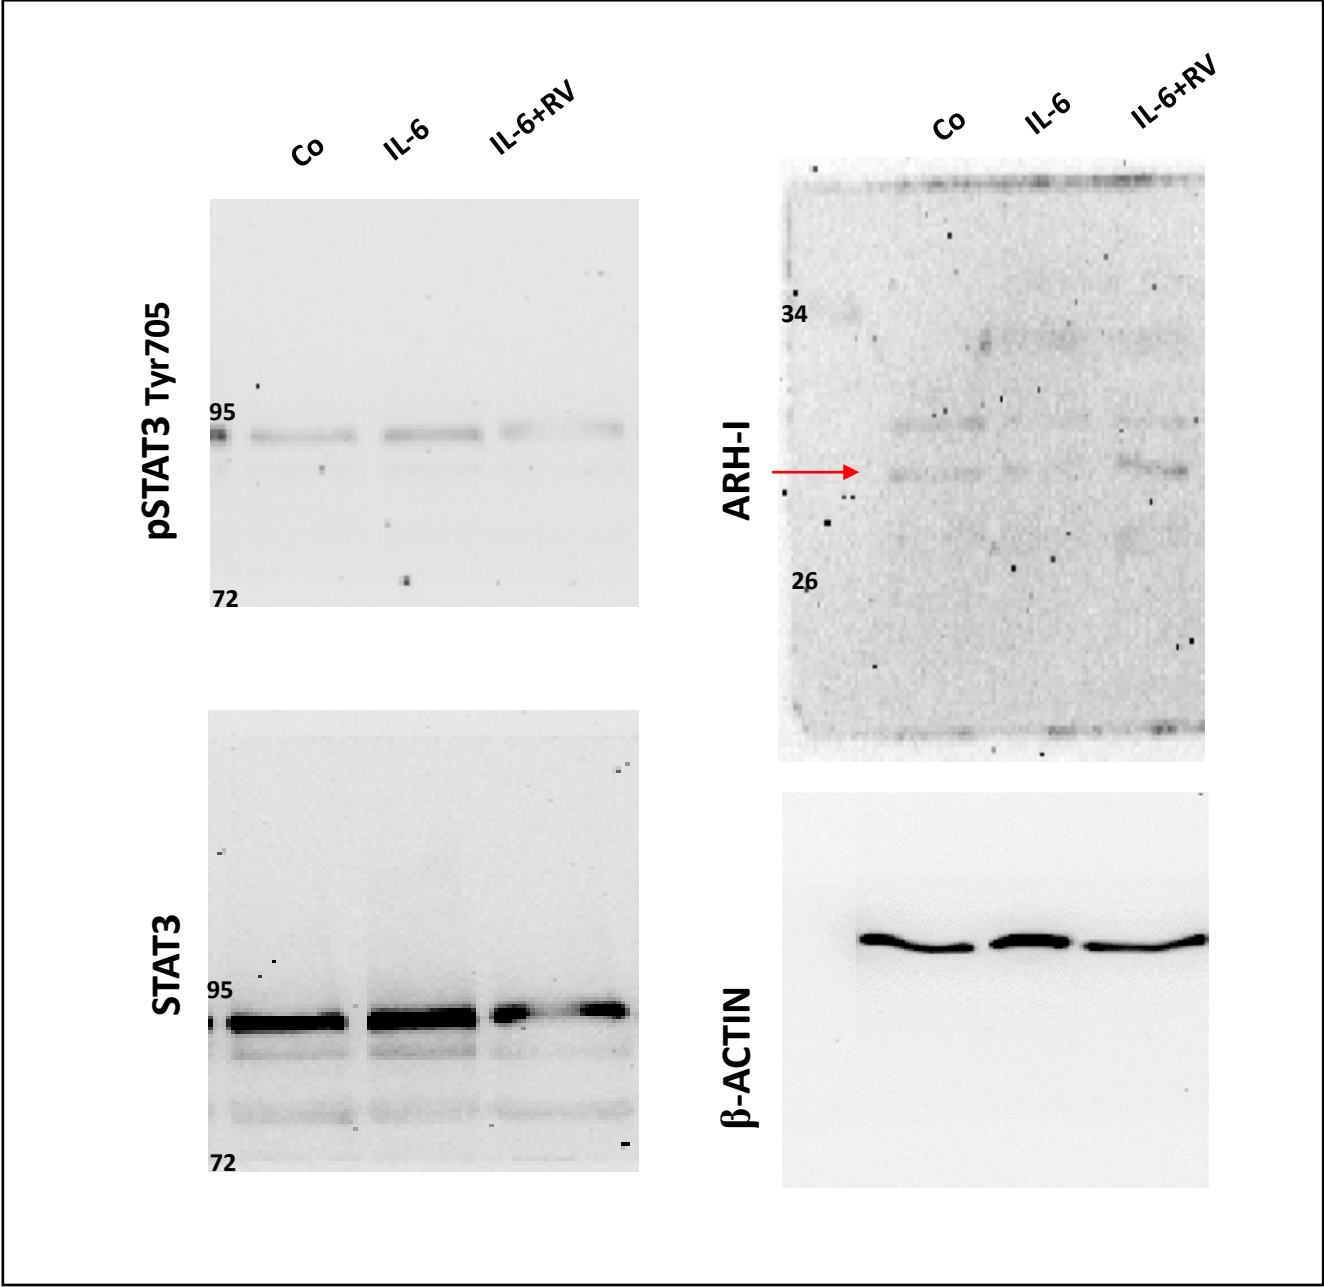

Figure 2 KURAMOCHI

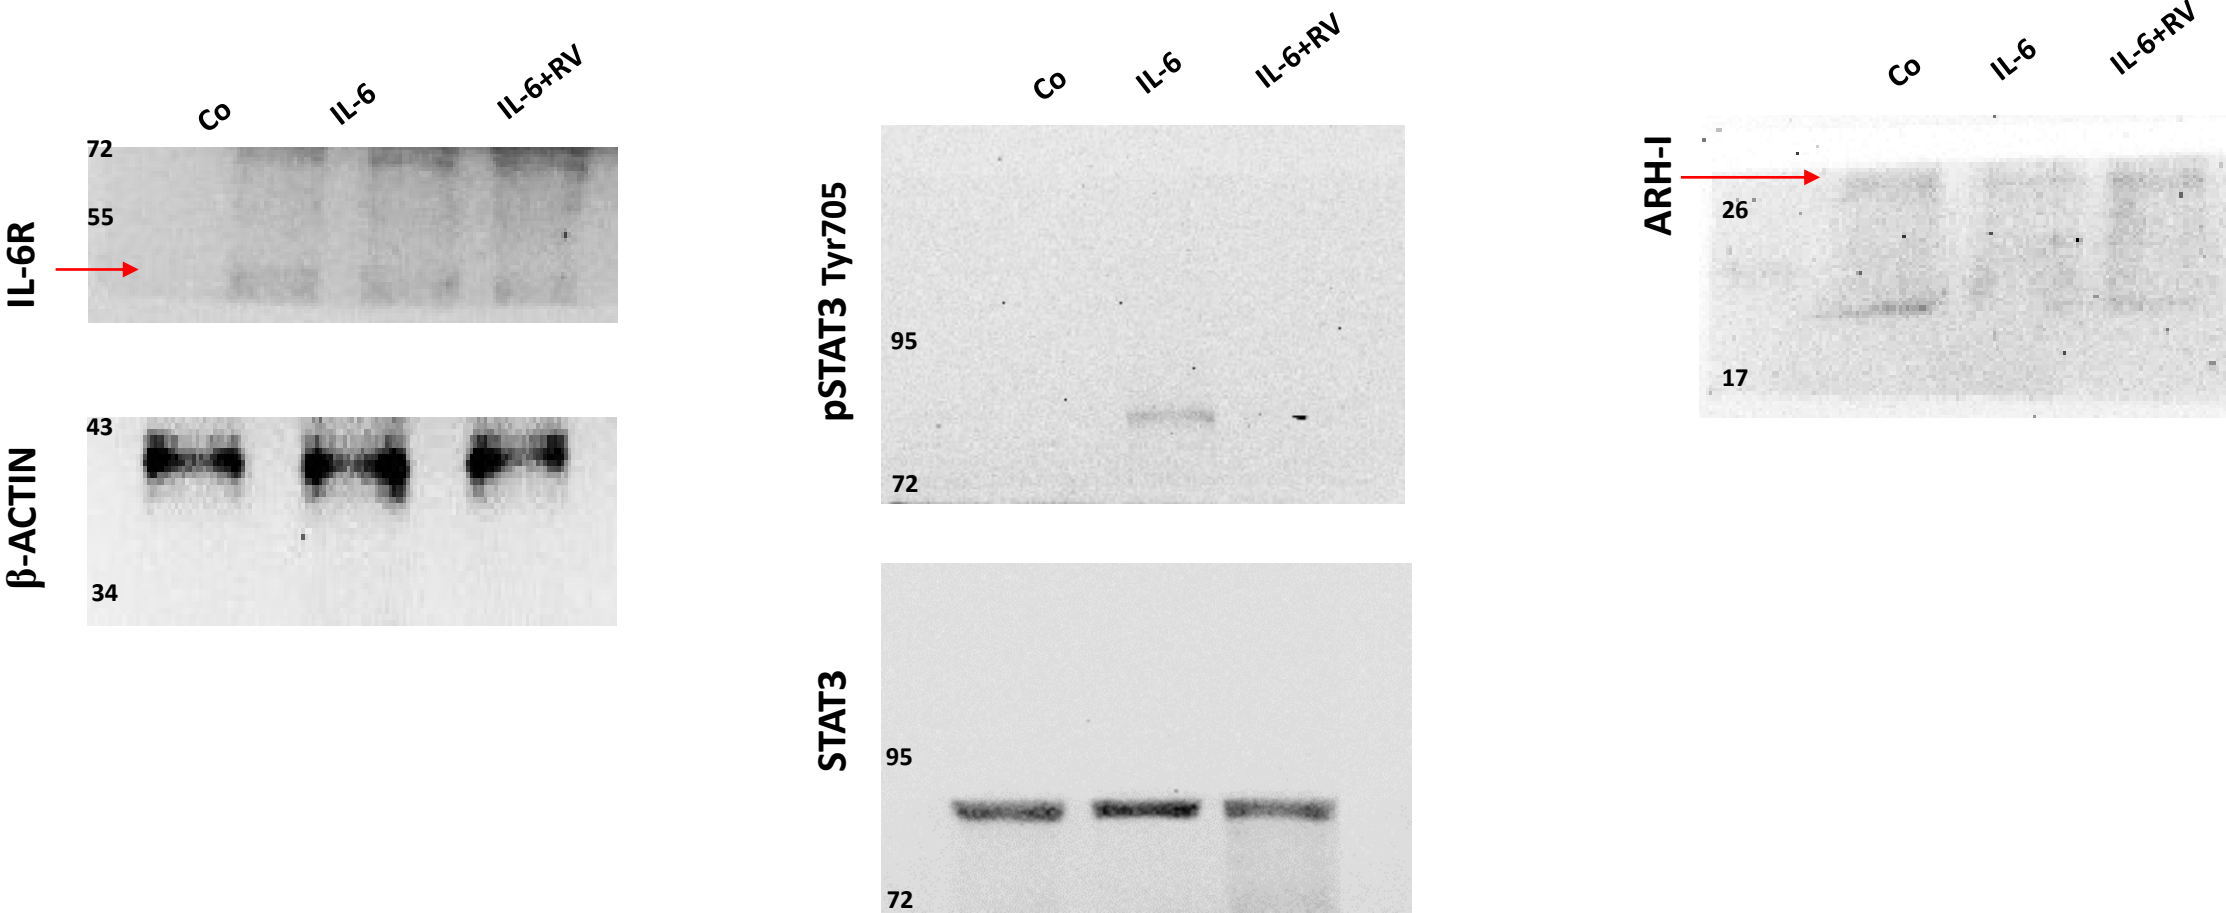

Figure 3C

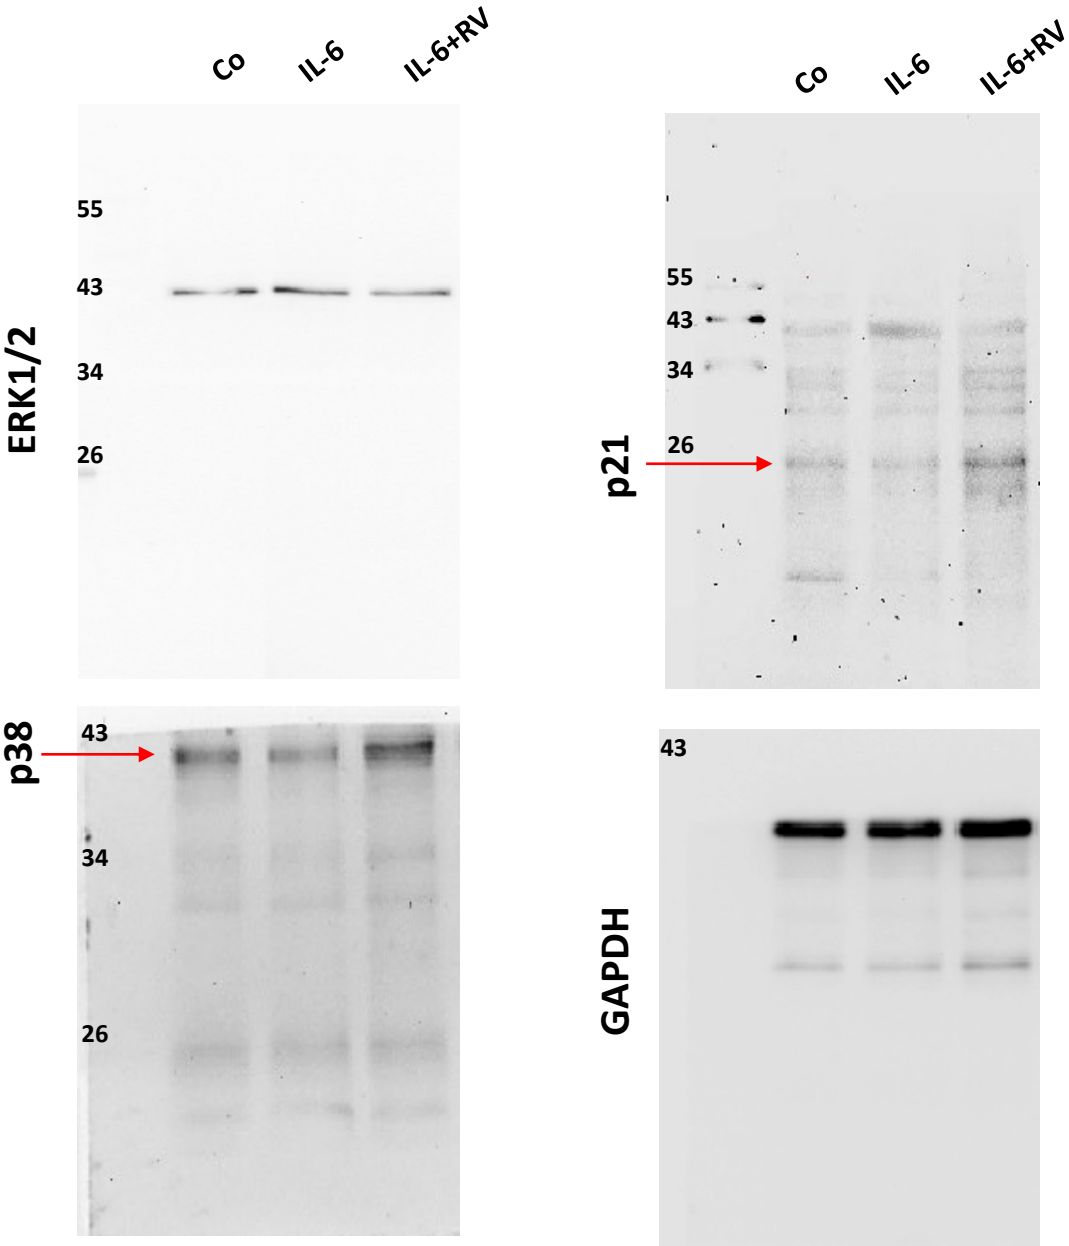

Figure 5

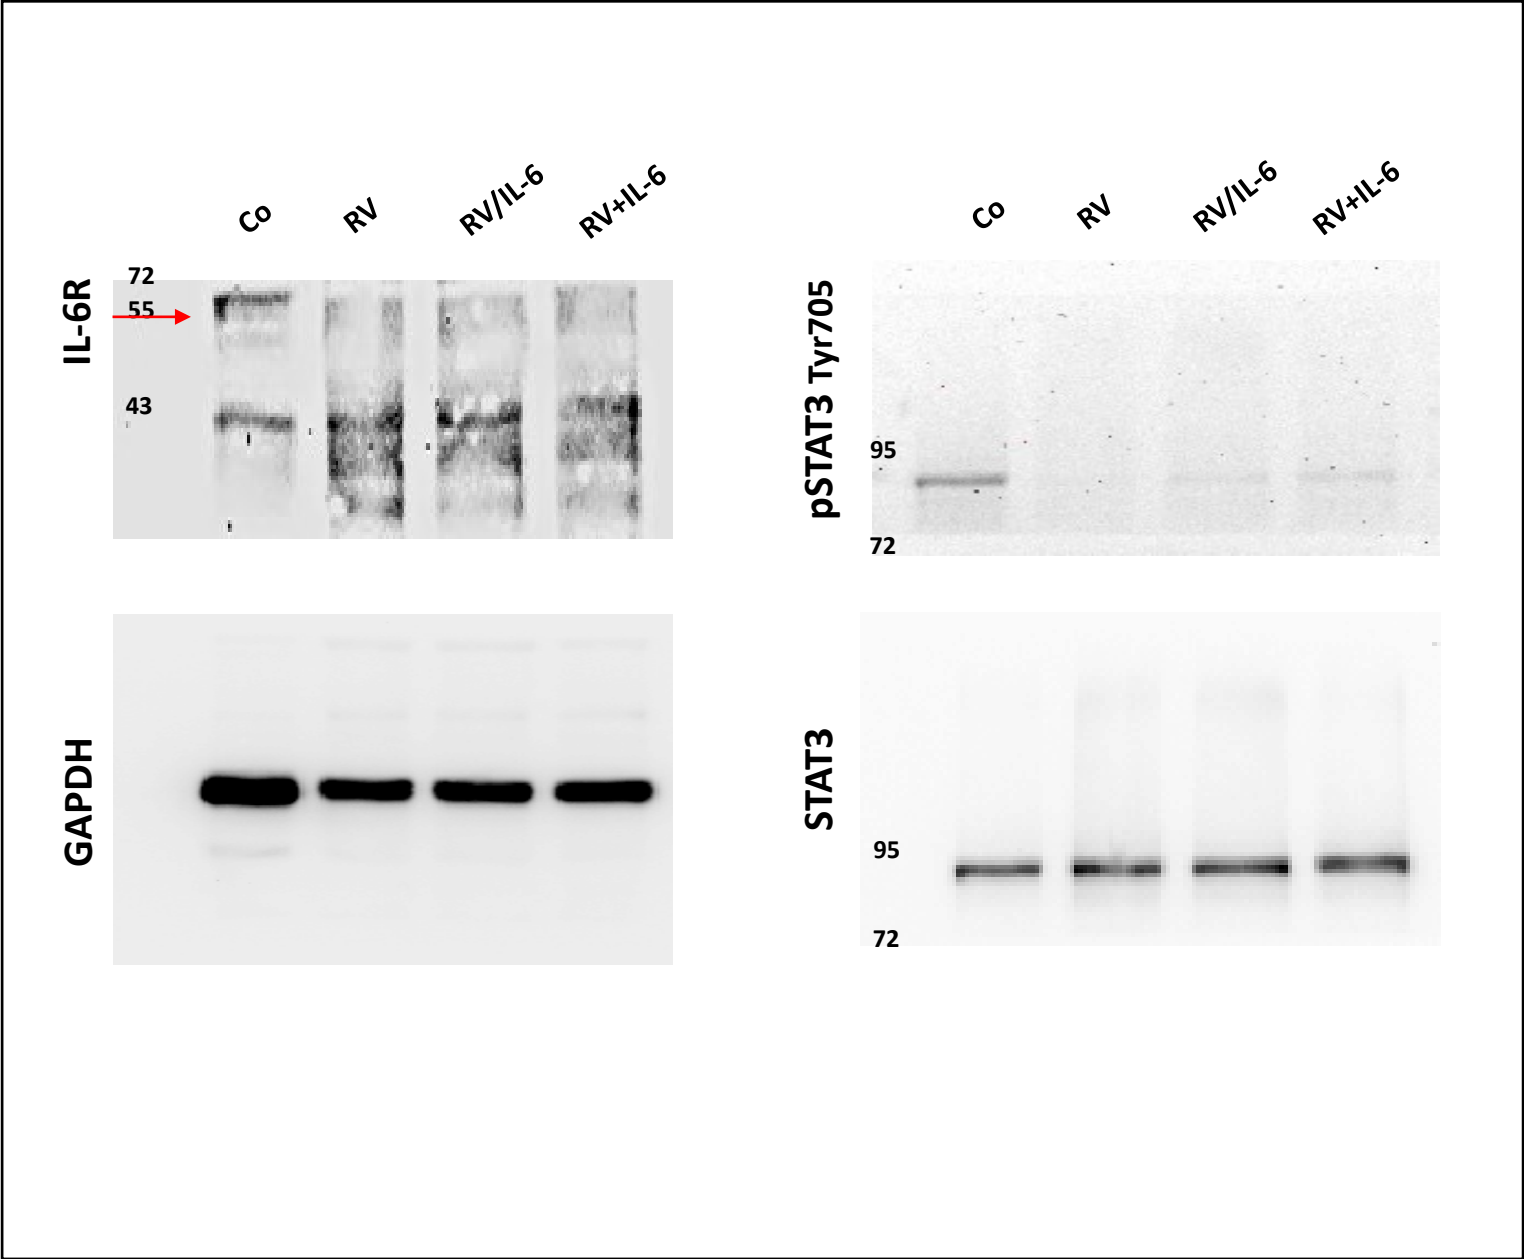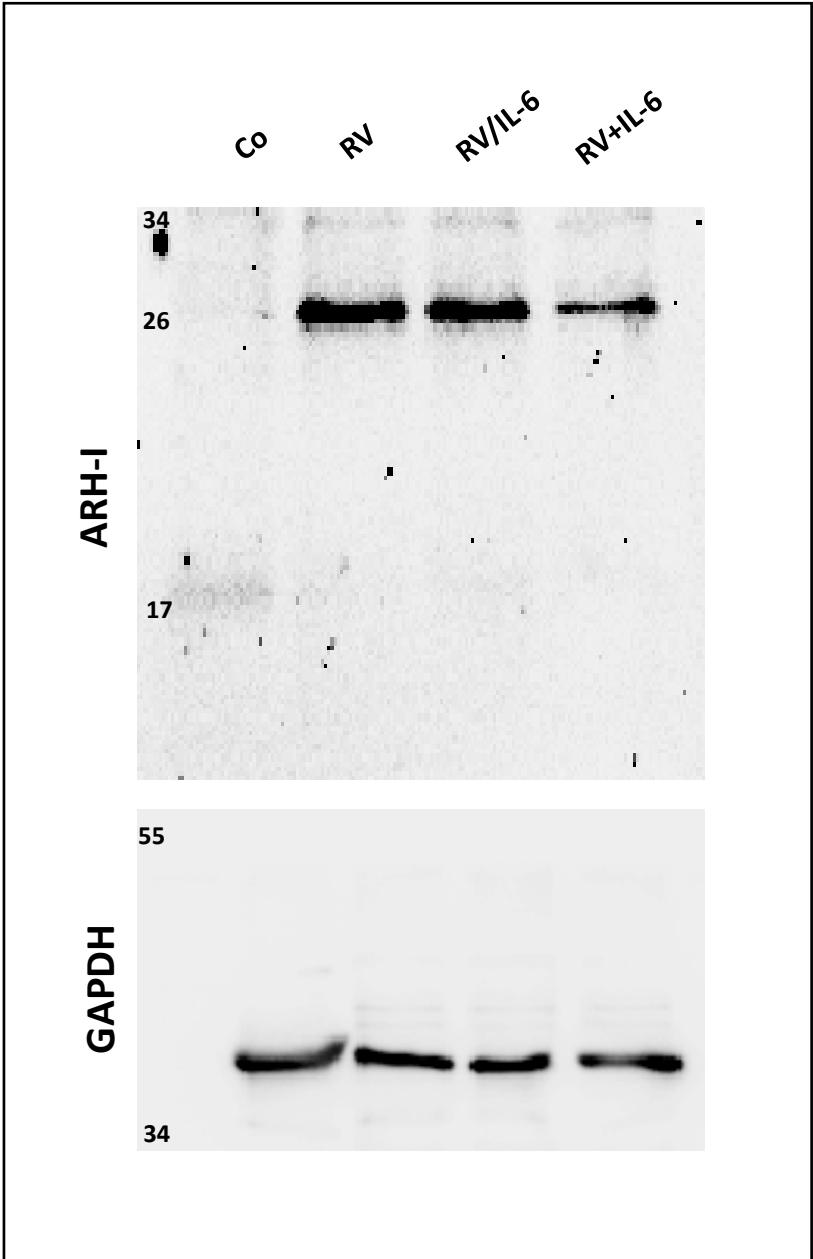

Figure 6C

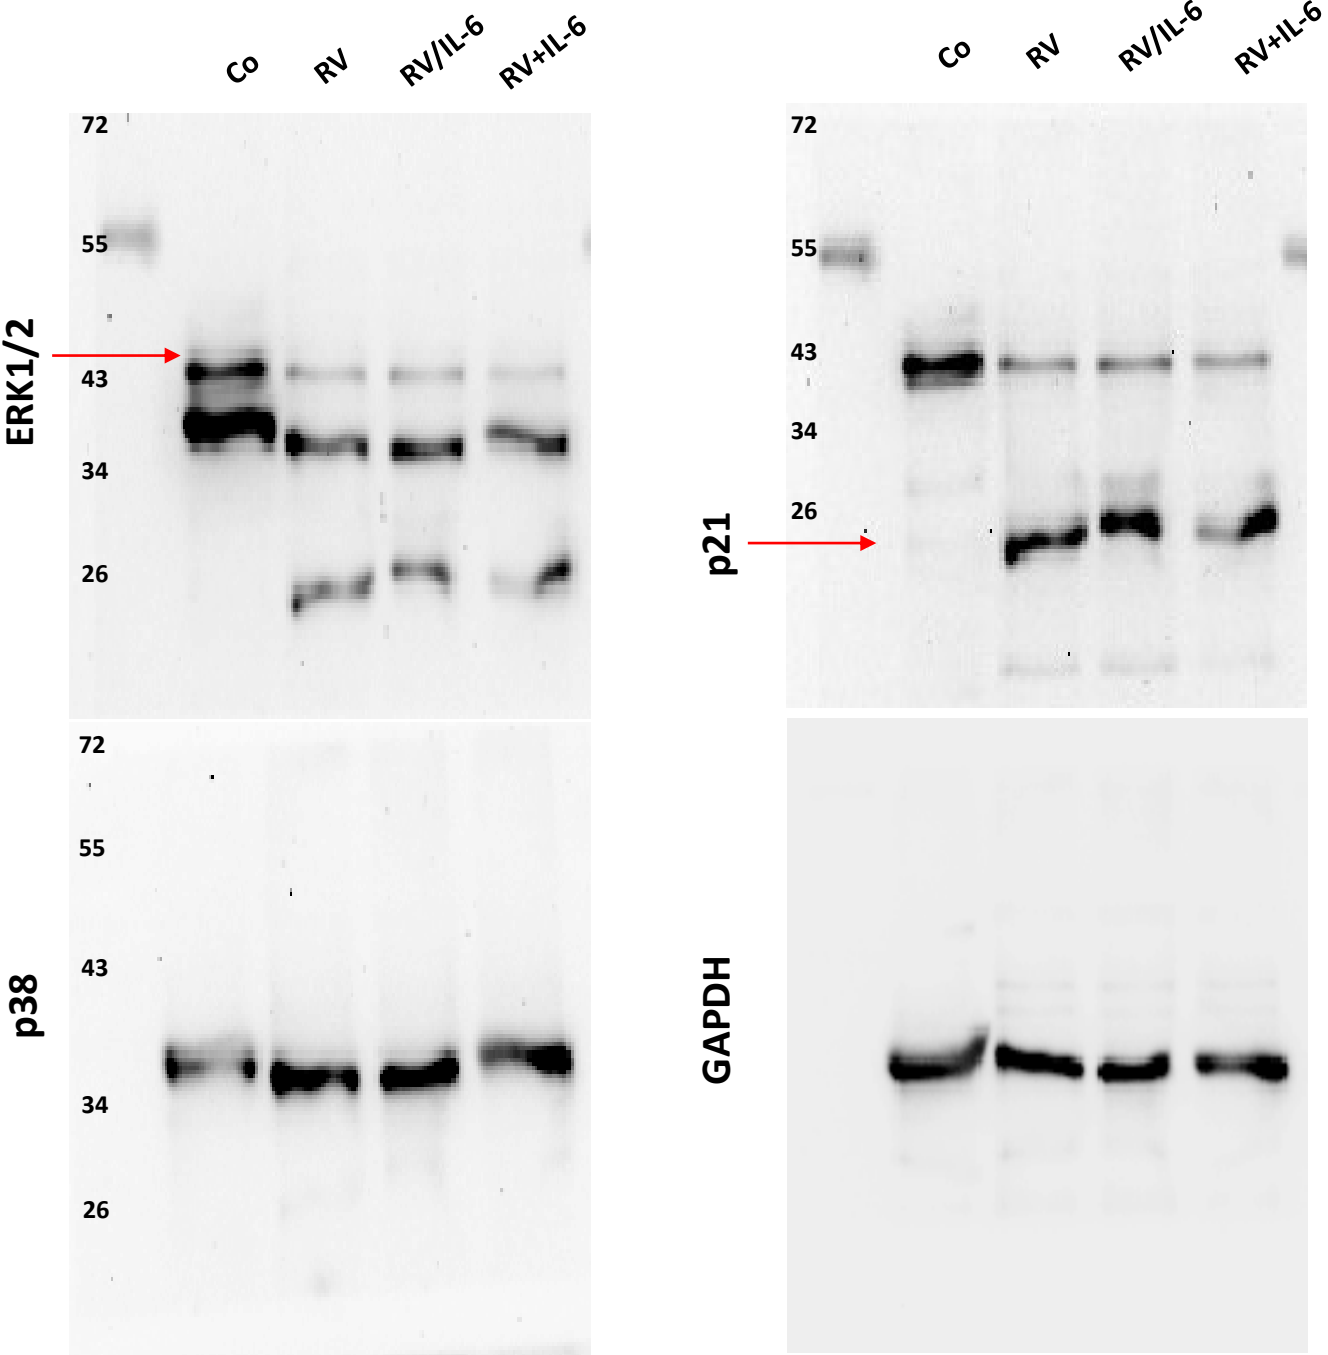

Figure 7A

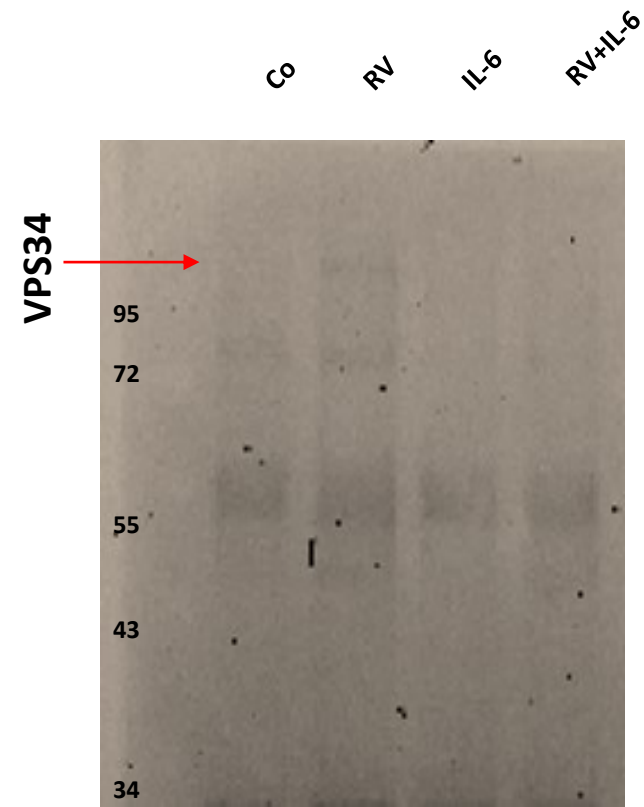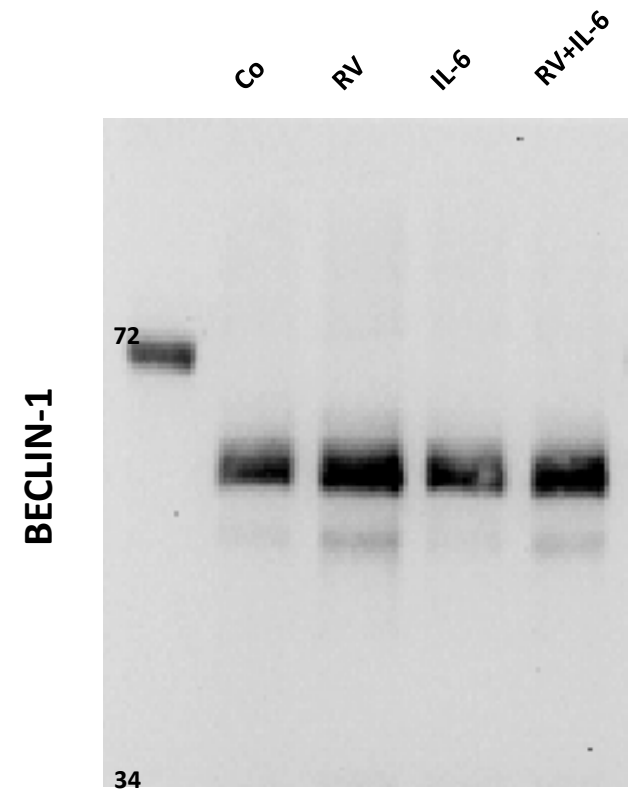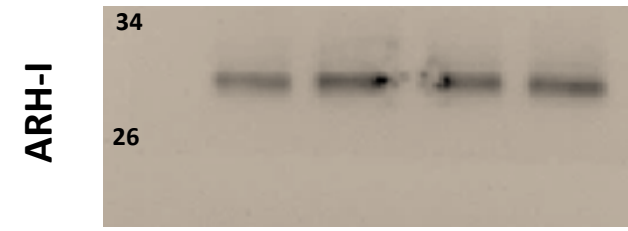

Figure 7C

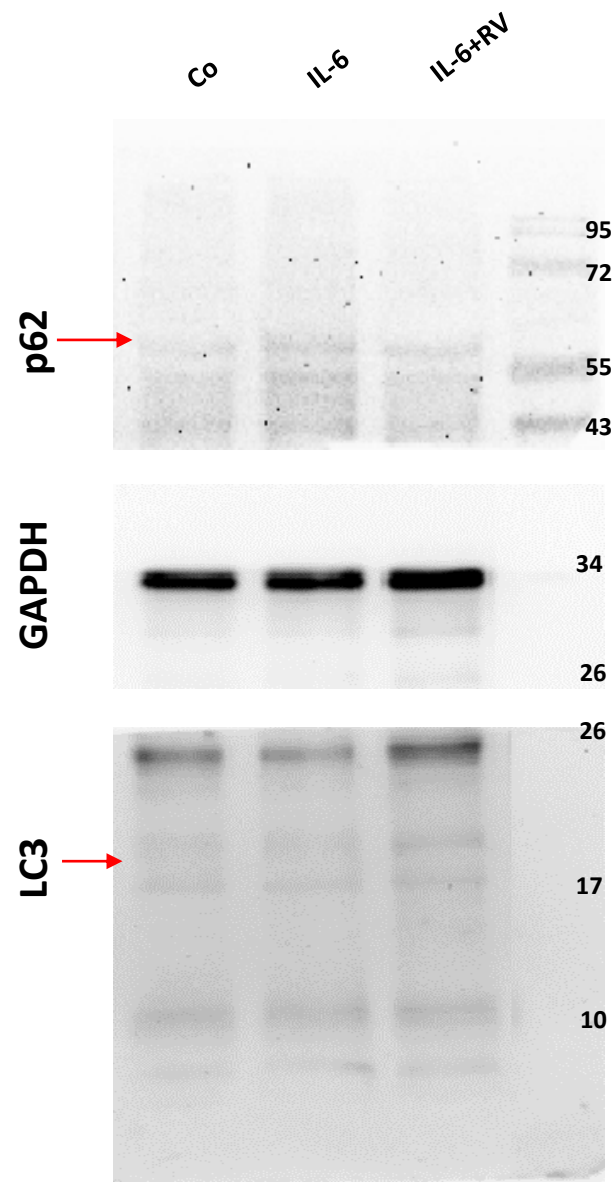



Figure 7E

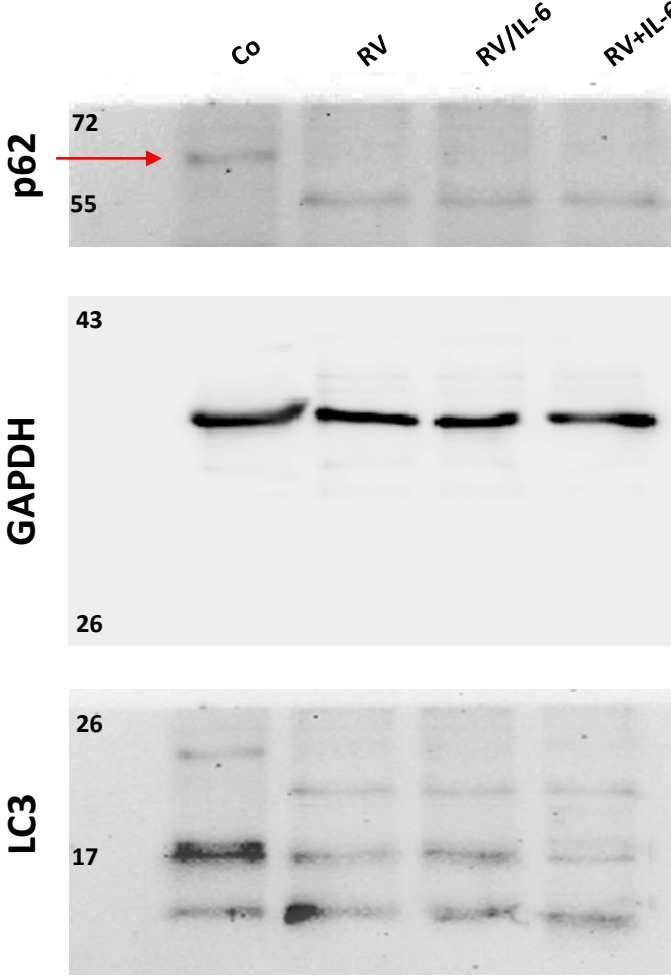

Figure 8F

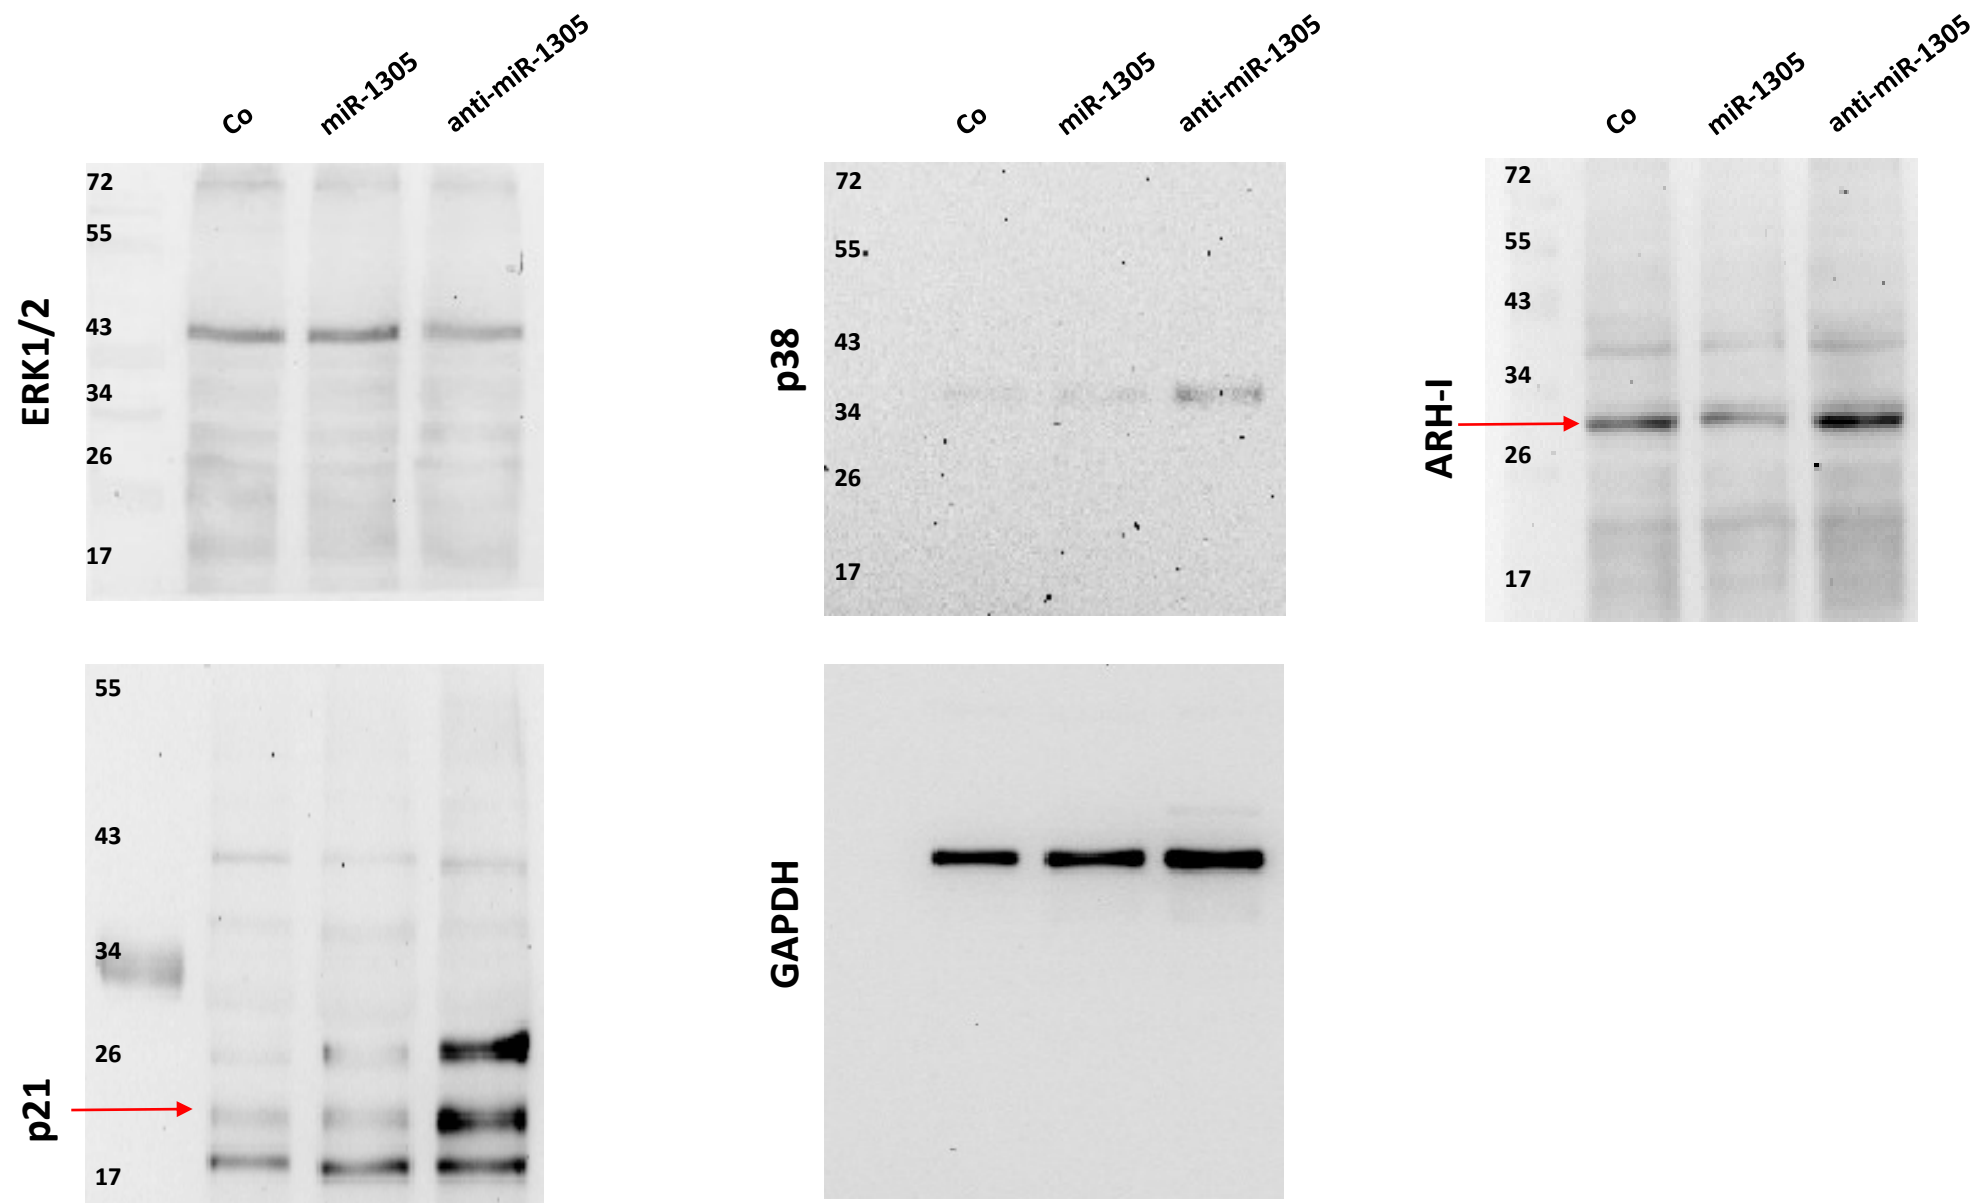

Figure 9A

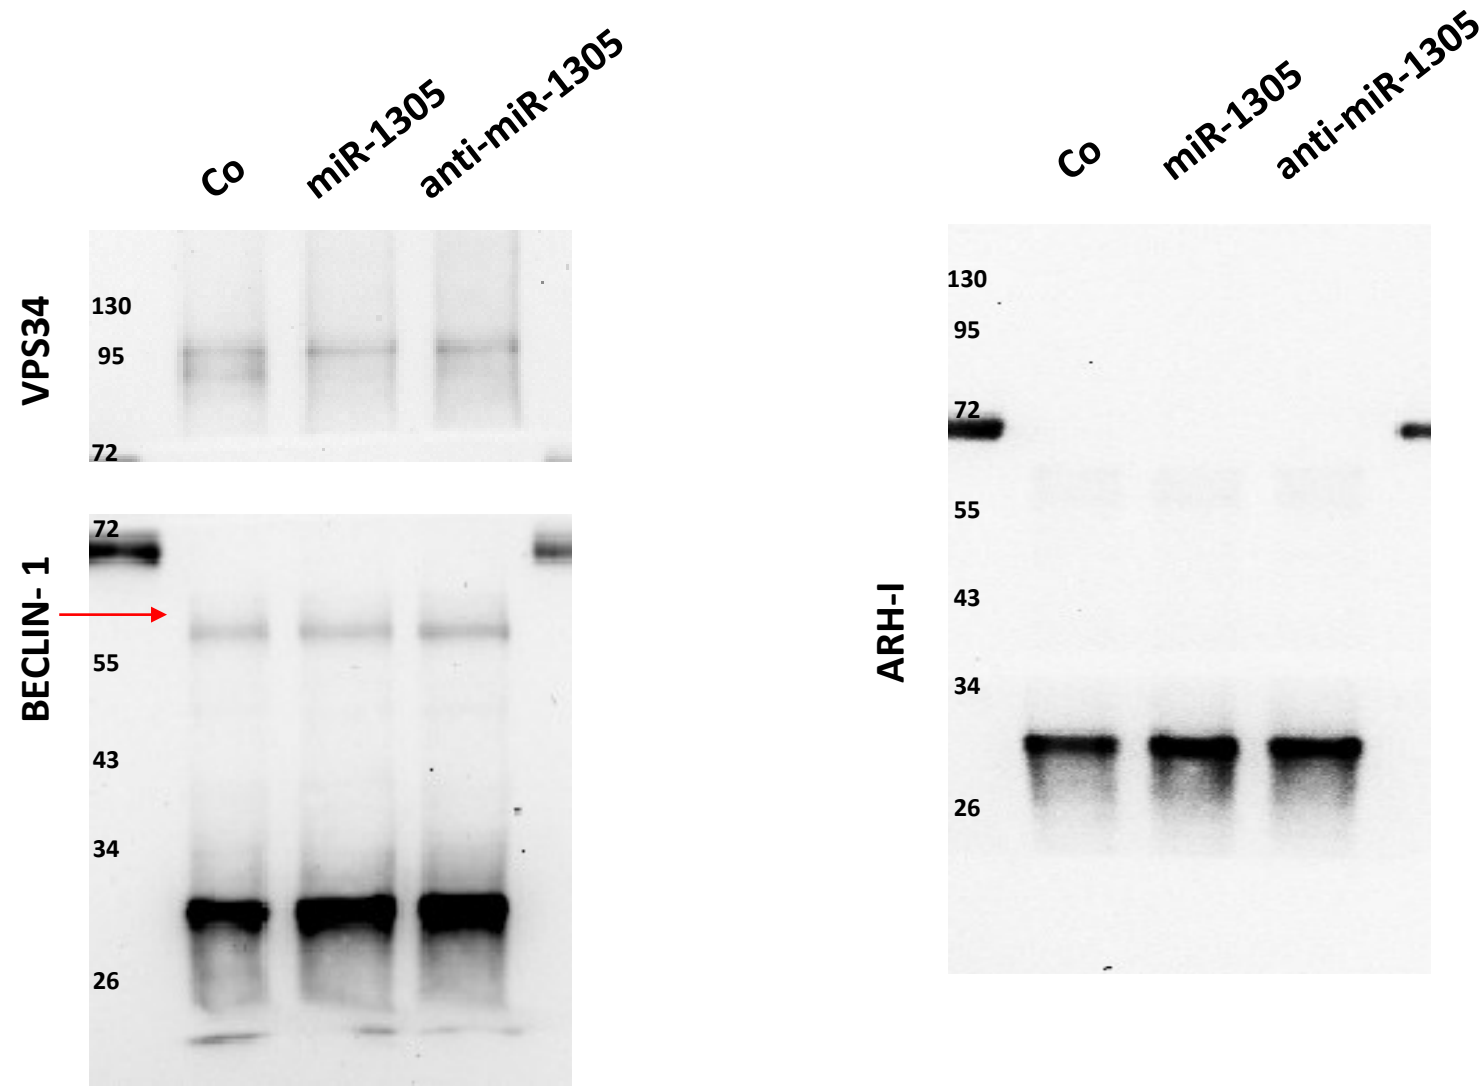

Figure 9B

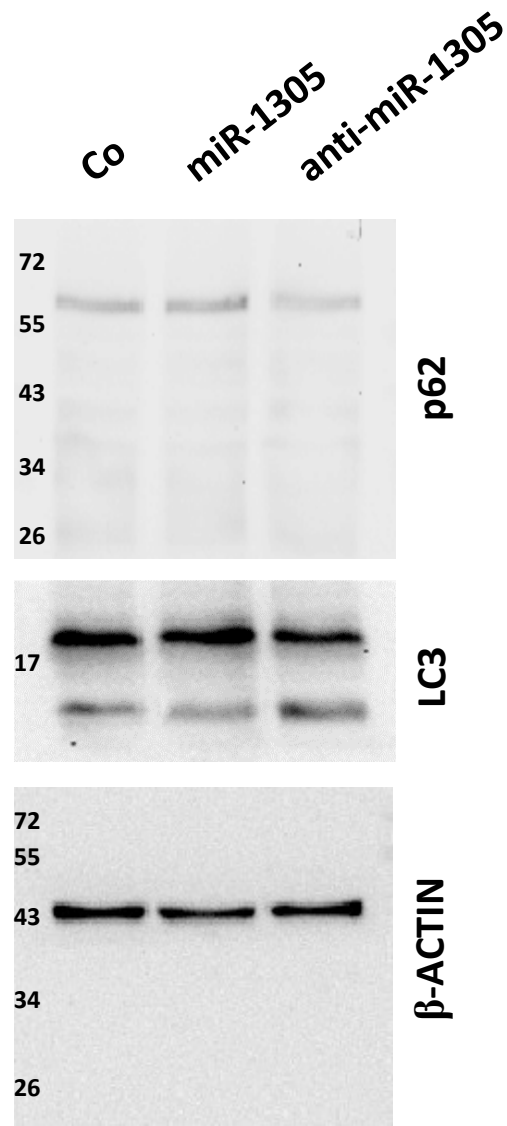

Figure 9C

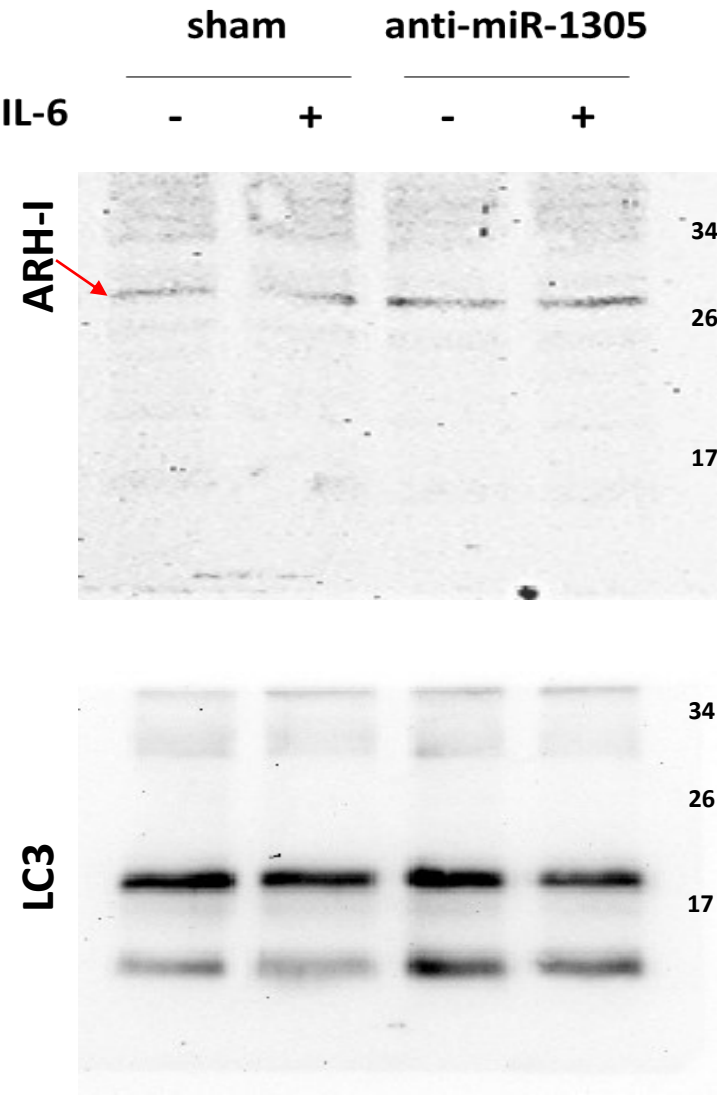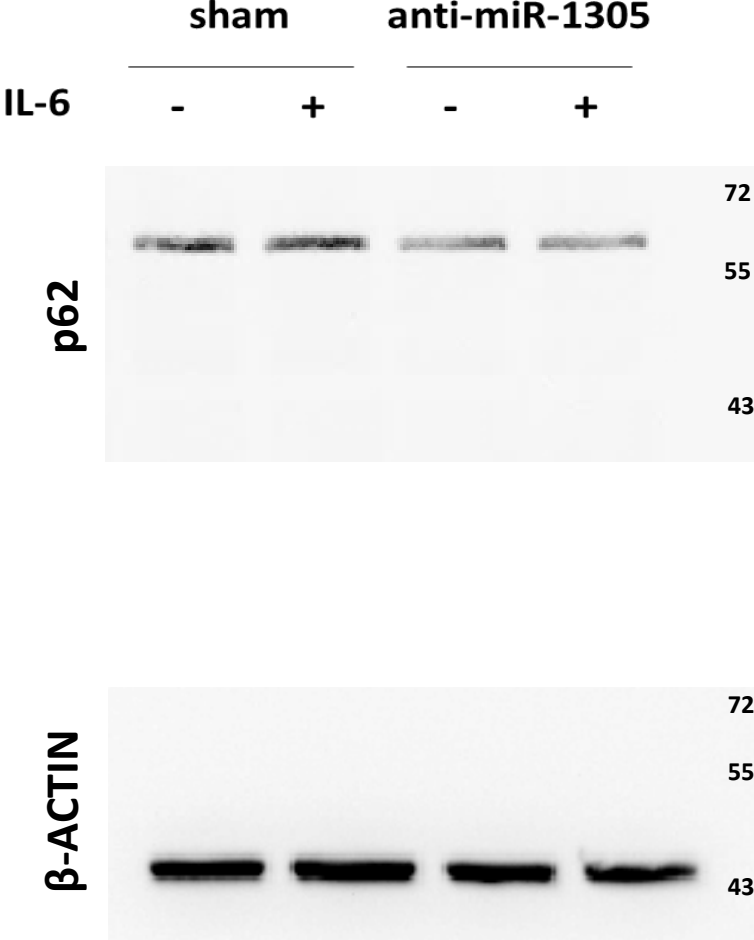

Supplement: s1 [file s1]
